# Supplementary material for: Detection of Coronaviruses Using RNA Toehold Switch Sensors
Source: PubMed Central journal article supplement (PMC7916667; doi:10.3390/ijms22041772), 2021-02-10
Supplement: ijms-22-01772-s001.pdf [file ijms-22-01772-s001.pdf]

## **Supplementary Information**

# **Detection of Coronaviruses using RNA Toehold Switch Sensors**

Soan Park and Jeong Wook Lee

**Table S1.** Sequences of toehold switch sensors and target regions.

| Target region                                    | Location in genome             | Normalized ensemble defect (%) | Sensor name | Sensor sequence                                                                                                                                                            |
|--------------------------------------------------|--------------------------------|--------------------------------|-------------|----------------------------------------------------------------------------------------------------------------------------------------------------------------------------|
| AGUUUCCAGGAC<br>GCUGCCUCUAAU<br>AUCUUUGUUAU<br>U | 9756<br>( <i>orf1ab</i> gene)  | 24.8                           | M1          | <u>TAATACGACTCACTATAGGGAATAACAAAGA</u><br><u>TATTAGAGGCAGCGTCCTGGAAACTGGACTTT</u><br><u>AGAACAGAGGAGATAAAGATGAGTTTCCAGG</u><br><u>ACAACCTGGCGGCAGCGCAAAAGATGCGTAA</u><br>A |
| GCAAACAUAGUC<br>UACGAGCCCACU<br>ACUCCCAUUUCG     | 11178<br>( <i>orf1ab</i> gene) | 19.3                           | M2          | <u>TAATACGACTCACTATAGGGCGCAAATGGGAG</u><br><u>TAGTGGGCTCGTAGACTATGTTTGCGGACTTTA</u><br><u>GAACAGAGGAGATAAAGATGGCAAACATAGTC</u><br><u>AACCTGGCGGCAGCGCAAAAGATGCGTAA</u>     |
| ACUUAUGCCAUC<br>UUUGCUUACUCA<br>CCACAGCUUACA     | 11511<br>( <i>orf1ab</i> gene) | 19.3                           | M3          | <u>TAATACGACTCACTATAGGGTGTAAGCTGTGG</u><br><u>TGAGTAAGCAAAGATGGCATAAGTGGACTTTA</u><br><u>GAACAGAGGAGATAAAGATGACTTATGCCATC</u><br><u>AACCTGGCGGCAGCGCAAAAGATGCGTAA</u>      |
| ACUACUCCCAUU<br>UCGUCAGCGCUG<br>AUUGCAGUUGC<br>A | 11199<br>( <i>orf1ab</i> gene) | 27.9                           | M4          | <u>TAATACGACTCACTATAGGGTGCAACTGCAAT</u><br><u>CAGCGCTGACGAAATGGGAGTAGTGGACTTTA</u><br><u>GAACAGAGGAGATAAAGATGACTACTCCATT</u><br><u>AACCTGGCGGCAGCGCAAAAGATGCGTAA</u>       |
| AGUUCAUGUCU<br>ACUCCCAAUGCC<br>AUCUUUAUUUC<br>UG | 19953<br>( <i>orf1ab</i> gene) | 17.2                           | M5          | <u>TAATACGACTCACTATAGGGCAGAAATAAAG</u><br><u>ATGGCATTGGGAGTAGACATGAACTGGACTTT</u><br><u>AGAACAGAGGAGATAAAGATGAGTTCATGTCT</u><br><u>GAACCTGGCGGCAGCGCAAAAGATGCGTAA</u>      |
| AAAUGGGCCGCU<br>UCUUCAAUCAUA<br>CUCUAGUUCUUU     | 21934<br>( <i>S</i> gene)      | 16.5                           | M6          | <u>TAATACGACTCACTATAGGGGAAAGAAGCTAGA</u><br><u>GTATGATTGAAGAAGCGGCCCATTTGGACTTTA</u><br><u>GAACAGAGGAGATAAAGATGAAATGGGCCGC</u><br><u>AAACCTGGCGGCAGCGCAAAAGATGCGTAA</u>    |
| CUCGCUUAUCGU<br>UUAAGCAGCUCU<br>GCGCUACUAUGG     | 27499<br>( <i>orf5</i> gene)   | 27.0                           | M7          | <u>TAATACGACTCACTATAGGGCCATAGTAGCGC</u><br><u>AGAGCTGCTTAAACGATAAGCGAGGGACTTTA</u><br><u>GAACAGAGGAGATAAAGATGCTCGCTTATCGA</u><br><u>AACCTGGCGGCAGCGCAAAAGATGCGTAA</u>      |
| ACACACCAAACC<br>AUUAUUUAUUA<br>GAAACUUCGAUC<br>A | 27280<br>( <i>orf5</i> gene)   | 14.0                           | M8          | <u>TAATACGACTCACTATAGGGTGATCGAAGTTT</u><br><u>CTAATAAATAATGGTTTTGGTGTGTGGACTTTAG</u><br><u>AACAGAGGAGATAAAGATGACACACCAAACA</u><br><u>AACCTGGCGGCAGCGCAAAAGATGCGTAA</u>     |
| GAGCCAUUAAAC<br>UUGACCCAAAGA<br>AUCCCAACUACA     | 29563<br>( <i>N</i> gene)      | 19.8                           | M9          | <u>TAATACGACTCACTATAGGGTGTAGTTGGGAT</u><br><u>TCTTTGGGTCAAGTTTAATGGCTCGGACTTTAG</u><br><u>AACAGAGGAGATAAAGATGGAGCCATTAAACA</u><br><u>ACCTGGCGGCAGCGCAAAAGATGCGTAA</u>      |
| GCCAUUAAACUU<br>GACCCAAAGAAU<br>CCCAACUACAAU     | 29565<br>( <i>N</i> gene)      | 19.2                           | M10         | <u>TAATACGACTCACTATAGGGATTGTAGTTGGG</u><br><u>ATTCTTTGGGTCAAGTTTAATGGCGGACTTTAG</u><br><u>AACAGAGGAGATAAAGATGGCCATTAAACTAA</u><br><u>ACCTGGCGGCAGCGCAAAAGATGCGTAA</u>      |
| AUGUCAUAUCA<br>ACAUCACAUAAA<br>UUAGUCUUGUC<br>UG | 16334<br>( <i>orf1ab</i> gene) | 23.1                           | S1          | <u>TAATACGACTCACTATAGGGCAGACAAGACT</u><br><u>AATTTATGTGATGTTGATATGACATGGACTTTAG</u><br><u>AACAGAGGAGATAAAGATGATGTCATATCAGA</u><br><u>ACCTGGCGGCAGCGCAAAAGATGCGTAA</u>      |

|             |          |      |    |                                          |
|-------------|----------|------|----|------------------------------------------|
| AUGACAAAGAU |          |      |    | <b>TAATACGACTCACTATAGGGAAATGACTTGAT</b>  |
| CCAAUUUCAA  | 29292    |      | S2 | <b>CTTTGAAATTTGGATCTTTGTCATGGACTTTAG</b> |
| GAUCAAGUCAU | (N gene) | 26.3 |    | <b>AACAGAGGAGATAAAGATGATGACAAAGATAA</b>  |
| UU          |          |      |    | <b>ACCTGGCGGCAGCGCAAAGATGCGTAAA</b>      |

The sequence of sensors consists of **T7 promoter** + **target region (a + b)** + conserved domain\_sequence + **a part of target region** (complementary sequence of stem region, b') + conserved domain sequence. The conserved domain sequence was from the series B sensor from the previous publication [1].

**Table S2.** List of RT-LAMP primer sequences

| Sensor <sup>†</sup>                                                          | RT-LAMP primer                                                                   | Sequence (5' to 3')                                                                            |
|------------------------------------------------------------------------------|----------------------------------------------------------------------------------|------------------------------------------------------------------------------------------------|
| M6                                                                           | F3                                                                               | ATTAGCCCATCTACCAGC                                                                             |
|                                                                              | B3                                                                               | TGGCAAAGAAGTATAGGAATT                                                                          |
|                                                                              | FIP with T7 promoter<br>(5' F1c-T7 promoter-F2 3')                               | ACCATCTGAGAAATTACCAACTGAATAATACGACTCACTATAG<br>GGGCTACTATACGAAAAATTTACCCT                      |
|                                                                              | FIP with T7 promoter<br>complementary sequence<br>(5' F2c-T7 promoter-F1 3')     | ACCATCTGAGAAATTACCAACTGAACCCTATAGTGAGTCGTATT<br>AGCTACTATACGAAAAATTTACCCT                      |
|                                                                              | BIP with T7 terminator<br>complementary sequence<br>(5' B2c-T7 terminator-B1 3') | CCGATGGATGTGGCACTTTACCAAAAAACCCCTCAAGACCCGT<br>TTAGAGGCCCAAGGGGTTATGCTACA<br>GGACAATGATTCCAGAG |
|                                                                              | BIP with T7 terminator<br>(5' B1c-T7 terminator-B2 3')                           | CCGATGGATGTGGCACTTTACTAGCATAACCCCTTGGGGCCTCT<br>AAACGGGTCTTGAGGGGTTTTTGCAG<br>GACAATGATTCCAGAG |
|                                                                              | BIP without T7 terminator                                                        | CCGATGGATGTGGCACTTTACCAGCAGGACAATGATTCC                                                        |
|                                                                              | Loop F <sup>‡</sup>                                                              | GAACCCAGCATAAAAGC                                                                              |
|                                                                              | Loop B                                                                           | TTTATTGTATTCTAGAGCCTCGCTC                                                                      |
|                                                                              | S1                                                                               | F3                                                                                             |
| B3                                                                           |                                                                                  | CTAATGGGTGGTTTATGTGATT                                                                         |
| FIP with T7 promoter<br>complementary sequence<br>(5' F2c-T7 promoter-F1 3') |                                                                                  | TGGTCGTAACAGCATTTACAACATACCCTATAGTGAGTCGTA<br>TTAACAGACTTCATTAAGATGTGGT                        |
| BIP without T7 terminator                                                    |                                                                                  | TAATCCGTATGTTTGCAATGCTCCCATACCTCCTAAGTAAAGT<br>TGAG                                            |
| Loop F <sup>‡</sup>                                                          |                                                                                  | AGAATGGTCTACGTATGCAAGC                                                                         |
| Loop B                                                                       |                                                                                  | AGGTTGTGATGTCACAGATGTG                                                                         |
| S2                                                                           | F3                                                                               | GTTCTTCGGAATGTCCGG                                                                             |
|                                                                              | B3                                                                               | CGGTAAGGCTTGAGTTTCA                                                                            |
|                                                                              | FIP with T7 promoter<br>complementary sequence<br>(5' F2c-T7 promoter-F1 3')     | CCAATTTGATGGCACCTGTGTCCCTATAGTGAGTCGTATTA<br>ATTGGCATGGAAGTCACAC                               |
|                                                                              | BIP without T7 terminator                                                        | AAGCATATTGACGCATACAAAACATGCCTTCTTCTTTTTG<br>TCCTT                                              |
|                                                                              | Loop F                                                                           | GGTCAACCACGTTCCCGA                                                                             |
|                                                                              | Loop B                                                                           | TCCCACCAACAGAGCCTAAA                                                                           |

<sup>†</sup>Target region of each sensor is amplified by RT-LAMP.

<sup>‡</sup>Loop F primer of M6 and S1 was obtained by changing the parameter condition from the default setting, T<sub>m</sub> 60 °C to 51 °C and dimer check -3.5 to -4.5.

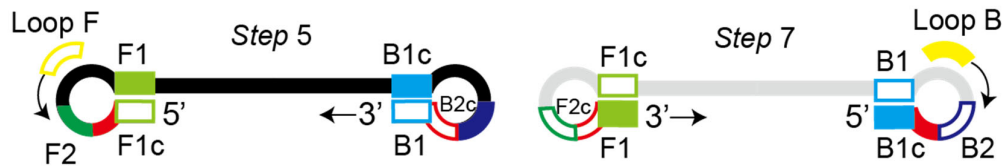

**Figure S1.** Schematic representation of Loop F and Loop B primers in the LAMP dumbbell-like structure

|            |     |                  |                                   |                                |                                  |
|------------|-----|------------------|-----------------------------------|--------------------------------|----------------------------------|
| MERS-CoV   | 1   | - TTGCTAATGGGTTT | GTCGTCGGTATAGGAGCAGCTGCCAA-TTCCA  | CTGT                           |                                  |
| SARS-CoV   | 1   | - TTGTCCGTGGTTGG | GTTTTTGGTTCTACCATGAACAACA--AGTCA  | CACAG                          |                                  |
| SARS-CoV-2 | 1   | - TAATAAGAGGCTGG | ATTTTTGGTACTACTTTAGATTCGA--AGACC  | CAG                            |                                  |
| HCoV-OC43  | 1   | - TTATTAAGATCGT  | GTAATGTATAGTGAGTTCCTGCTAT-AACTA   | TATAG                          |                                  |
| HCoV-NL63  | 1   | AACACTACTTTTGAT  | TTTTTAAGTAATGCTTCTAGTTCTTTGACT    | GAT                            |                                  |
| HCoV-HKU1  | 1   | - TGTATGTTAATAAA | ACTTTGTATAGTGAGTTTAGTACTAT-AGTTA  | TATAG                          |                                  |
| MERS-CoV   | 51  | GC               | ACTG-TTATTATTAGCCCATCTACCAG-CGCTA | CTATACGAAAAATTT                |                                  |
| SARS-CoV   | 51  | TC               | GGTGATTATTATTAACAATTCTACTAA-TGTT  | GTTATACGAGCATGTA               |                                  |
| SARS-CoV-2 | 51  | TC               | CCTACTTATTGTTAATAACGCTACTAA-TGTT  | GTTATTAAGTCTGTG                |                                  |
| HCoV-OC43  | 51  | GT               | AGTACTT-TTGTAATACATCCTATAG-TGTGG  | TAGTACAACCACGTA                |                                  |
| HCoV-NL63  | 51  | AG               | TTAATTTGTTATTTACAGAACAGTTAGGTGC   | GCCTTTGGGCATAACTA              |                                  |
| HCoV-HKU1  | 51  | GT               | AGTGTTTT-TATTAACAACCTCTTATAC-TATT | GTTGTTCAACCTCATA               |                                  |
| MERS-CoV   | 101 | AC               | CCTGCTTTT-----ATGCTGG-----        | -----GTTCTTCAG                 |                                  |
| SARS-CoV   | 101 | AC               | TTTTGA-----ATTGTG-----TGACA       | ACCCTTTCT----                  |                                  |
| SARS-CoV-2 | 101 | AA               | TTTCA-----ATTTG-----TAATG         | ATCCATTT-----                  |                                  |
| HCoV-OC43  | 101 | CA               | ATCAATTAACACAGGATGGTGATAATAAATT   | ACAAGGTCTTTTAGAG               |                                  |
| HCoV-NL63  | 101 | TA               | TCTGGTGAA-----ACTGTG-----         | -----CGTCTGCATTTATAT           |                                  |
| HCoV-HKU1  | 101 | -----            | -----ATGGTG-----                  | -----TTTTGGAG                  |                                  |
| MERS-CoV   | 151 | TT               | GGTAATTTCTCAGATGGTA               | AAATGGGCCGCTTCTTCAATCATACTCTA  |                                  |
| SARS-CoV   | 151 | -TT              | GCTGTTTCTAAAC--CCA-TGGGTA-CACAG   | AC--ACATACTATGA                |                                  |
| SARS-CoV-2 | 151 | -T               | GGGTGTTTATTACC--ACA-AAAACAACAA    | AAGTTGGATGGAAAGTGA             |                                  |
| HCoV-OC43  | 151 | GT               | CTCTGTTTGCCAGT--ATAATATGTGCGAG    | TACCCACAACGATTTGT              |                                  |
| HCoV-NL63  | 151 | AA               | TGTAACCTCGT-ACT--TTTTATGTGCCAG    | CAGCTT-ATAACTTACT              |                                  |
| HCoV-HKU1  | 151 | AT               | TACAGCTTGTC AAT--ACA              | CTATGTGTGAGTATCCTCATACTATTTGT  |                                  |
| MERS-CoV   | 201 | GT               | TCTTTTGCCCGATGGATGTGGCACTTTACTT   | AGAGCTTTTTTATTGTA              |                                  |
| SARS-CoV   | 201 | TAT              | TTCGA-----TAATGCA-TTTAATTGCA-     | CTTCGAGTACAT                   |                                  |
| SARS-CoV-2 | 201 | GT               | TCAGAGG-----TTTATTCTAGTGCG-AATA   | AATTGCA-CTTTGAAATATGT          |                                  |
| HCoV-OC43  | 201 | CA               | TCTAACCTGGGTAATCATCGCA-AAGA       | ACTATGGCATTTTGGATACAG          |                                  |
| HCoV-NL63  | 201 | AA               | ACTTA                             | GTGTTAAATGTTACTTTA-ACTATTCCTGT | TTTTTAGTGT-T                     |
| HCoV-HKU1  | 201 | AA               | ATCTAA                            | -----AGGTAGTTCTCGTA-ATGAATCTT  | GGCATTTTGATAAAT                  |
| MERS-CoV   | 251 | -T               | CTAGAGCCTCGCTCTGGAAATCATTTGCTC    | TGCTGGCAATTCCTATA              |                                  |
| SARS-CoV   | 251 | AT               | CTGATGCCTTTTCGCTTGATGTTTCAGAAA    | A--GTCAGGTAATTTTAA             |                                  |
| SARS-CoV-2 | 251 | C                | TCTCAGCCTTTTCTTATGGACCTTGAAGG     | AAA--ACAGGTAATTTCAA            |                                  |
| HCoV-OC43  | 251 | GT               | GTTGTTTCTGTTTATATAAGCGTAATTT      | CACATATGATGTGAATGCT            |                                  |
| HCoV-NL63  | 251 | GT               | CAACGCCACCGTTACTGTGAATGTCACCA     | CA--CATAATGGCCGTGTA            |                                  |
| HCoV-HKU1  | 251 | CT               | GAACTTTGTGTCTGTTCAAGAAAAATTTT     | ACTTATAATGTTTCTACA             |                                  |
| MERS-CoV   | 301 | T                | CTTTTGCCACTTATCACACTCCTGCAACAG    | ATTGTTCTGATGGCAATTA            |                                  |
| SARS-CoV   | 301 | CA               | CTTACGAGAGTTTGTGTTTAAAAATAAAG     | ATGGGTTTCTCTATGTTTA            |                                  |
| SARS-CoV-2 | 301 | AA               | TCTTAGGGAATTTGTGTTAAGAATATTG      | ATGGTTATTTTAAATATA             |                                  |
| HCoV-OC43  | 301 | G                | ATTATTTGTATTTTCAATTTTATCAAGA      | AAGGTGGTACTTTTTATGCATA         |                                  |
| HCoV-NL63  | 301 | G                | TAACTACACTGTTTGTGATGATTGTAAT      | GGTTATACTGATAACATATT           |                                  |
| HCoV-HKU1  | 301 | G                | ATTGGTTGATTTTCAATTTTATCAAGA       | ACGTTGGCACTTTTTATGCTTA         |                                  |
| MERS-CoV   | 351 | CA               | ATCGTAATG                         | CCAGTCTGA                      | ACTCTTTTAAAGGAGTATTTTAAATTTACGTA |
| SARS-CoV   | 351 | TA               | AGGGCTATCA                        | -----A-----CCTATAGATGTAGTT     | CGTGATCTACCTT                    |
| SARS-CoV-2 | 351 | TT               | CTAAGCACA                         | C-----G-----CCTATTAATTTAGT     | GGTGTATCTCCCTC                   |
| HCoV-OC43  | 351 | TT               | TACAGACA                          | CTGGTGT--GTTACTAAGTTTTTTGT     | TTAATGTTTATT                     |
| HCoV-NL63  | 351 | TT               | CTGTTCAAC                         | AGGATGGCCGCATTCCTAATGGTTTTCC   | CT--TTAATAA                      |
| HCoV-HKU1  | 351 | TT               | ATGCTGATT                         | CTGGCATG--CCTACTACTTTTTTATTT   | AGTTTGTATC                       |

**Figure S2.** Sensor M6's target RNA and its upstream and downstream flanking sequences in the S gene of MERS-CoV. Homology regions to this sequence from other coronaviruses including SARS-CoV, SARS-CoV-2, HCoV-OC43, HCoV-NL63, and HCoV-HKU1 were aligned for sequence comparison. The red box indicates the homologous sequences of the target region of sensor M6. The blue box denotes the homologous sequences of its

upstream and downstream flanking sequences that were synthesized for the cross-reactivity test. HCoV-229E sequence was excluded from the alignment; it showed many mismatches and gaps.

|            |     |           |                                                     |
|------------|-----|-----------|-----------------------------------------------------|
| SARS-CoV-2 | 1   | - - - - - | GCTGTTGGGGCTTGTGTTCTTTGCAATTCACAGACTTCATT           |
| SARS-CoV   | 1   | GTCTTGCAG | GCTGTAGGTGCTTGTGTATTGTGCAATTCACAGACTTCACT           |
| MERS-CoV   | 1   | ACTTTGCAG | GCTGTGCGTTCATGCGTGTATGCCATTCACAGACTTCCCT            |
| HCoV-229E  | 1   | GTATTACAA | GCTGCTGGTCTTTGTGTAGTATGTGGTTCTCAAACAGTTCT           |
| HCoV-OC43  | 1   | GTTATGCAG | AGTGTGGAGCTTGCCTGGTCTGCTCTTCTCAAACATCATT            |
| HCoV-NL63  | 1   | ATATTGCAA | GCTGCTGGTTTATGTGTTGTTTGTGGTTCACAACTGTACT            |
| HCoV-HKU1  | 1   | GTGATGCAG | AGTGTAGGTGCATGCGTGTGTTGTTCATCACAACTTCTTT            |
| SARS-CoV-2 | 51  |           | AAGATGTGGTGCCTTGCATACGTAGACCATTCTTATGTTGTAATGCTGTT  |
| SARS-CoV   | 51  |           | TCGTTGCGGTGCCTGTATTAGGAGACCATTCTATGTTGCAAGTGCTGCT   |
| MERS-CoV   | 51  |           | ACGCTGTGGGACATGCATCCGTAGACCATTTCTCTGCTGTAATGCTGCT   |
| HCoV-229E  | 51  |           | AAGATGCGGTGATTGTTTACGCAAGCCGATGTTGTGCACTAAGTGCGCT   |
| HCoV-OC43  | 51  |           | ACGTTGTGGCAGTTGCATCAGAAAGCCTCTTCTTGTGCAAGTGTTGTT    |
| HCoV-NL63  | 51  |           | TCGTTGTGGTATTGTTGCTGCGTAAGCCTATGTTGTGCACTAAATGCGCAT |
| HCoV-HKU1  | 51  |           | GCGTTGTGGCAGTTGTATACGTAAGCCTTTGTTATGTTGTAATGTTGTT   |
| SARS-CoV-2 | 101 |           | ACGACCATGTCATATCAACATCACATAAATTAGTCTTGTCTGTTAATCCG  |
| SARS-CoV   | 101 |           | ATGACCATGTCATTTCAACATCACACAAATTAGTGTGCTGTTAATCCC    |
| MERS-CoV   | 101 |           | ATGATCATGTTATAGCAACTCCACATAAGATGGTTTTGTCTGTTTCTCCT  |
| HCoV-229E  | 101 |           | ATGATCATGTTGTTTGGCACTGATCATAAGTTCAATTTAGCTATTACACCA |
| HCoV-OC43  | 101 |           | ATGATCATGTTATGGCGACTGATCATAAATATGCTTGGAGTGTTCACCA   |
| HCoV-NL63  | 101 |           | ATGATCATGTTATTTGGTACCGACCACAAGTTTATTTTGGCTATAACACCG |
| HCoV-HKU1  | 101 |           | ATGACCATGTTATGGCAACTAATCATAAATATGTTTTGAGTGTCTCACCT  |
| SARS-CoV-2 | 151 |           | TATGTTTGC AATGCTCCAGGTTGTGATGTCACAGATGTGACTCAACTTTA |
| SARS-CoV   | 151 |           | TATGTTTGC AATGCCCAAGGTTGTGATGTCAGTGTGACACAACCTGTA   |
| MERS-CoV   | 151 |           | TACGTTTGT AATGCCCTGGTTGTGGCGTTTCAGACGTTACTAAGCTATA  |
| HCoV-229E  | 151 |           | TATGTGTGT AACAACACTCTGGCTGCAATGTAATGACGTTACAAAAGTGA |
| HCoV-OC43  | 151 |           | TATGTGTGT AATGCACCAGGATGTGATGTAATGATGTTACCAAATTGTA  |
| HCoV-NL63  | 151 |           | TATGTATGT AATGCATCAGGTTGTGGTGTAGTGTGCAAAAAATTGTA    |
| HCoV-HKU1  | 151 |           | TACGTTTGT AATGCACCTAACTGTGATGTGAGTGTGTCACCAAATTATA  |
| SARS-CoV-2 | 201 |           | CTTAGGAGGTATGAGCTATTATTGTAATCACATAAACCACCCATTAGTT   |
| SARS-CoV   | 201 |           | TCTAGGAGGTATGAGCTATTATTGCAAGTCACATAAGCCTCCCATTAGTT  |
| MERS-CoV   | 201 |           | TTTAGGTGGTATGAGCTACTTTTGTGTAGATCATAGACCTGTGTGAGTT   |
| HCoV-229E  | 201 |           | TCTTGGAGGTTTGAATTACTGTGTAGACCACAACCACATCTTTCAT      |
| HCoV-OC43  | 201 |           | TCTAGGTGGTATGTCATATTATTGTGAAGACCATAAGCCACAATATTCAT  |
| HCoV-NL63  | 201 |           | TCTTGGTGGTTTGAATTACTATTGTACAAATCATAAACCACAGTTGTCTT  |
| HCoV-HKU1  | 201 |           | TTTGGGCGGTATGCTTACTATTGTGAAAACCATAAACCCATTATTAT     |
| SARS-CoV-2 | 251 |           | TTCCATTGTGTGCTAATGGACAAGTTTTTGGTTTATATAAAAATACATGT  |
| SARS-CoV   | 251 |           | TTCCATTATGTGCTAATGGTCAGGTTTTTGGTTTATACAAAACACATGT   |
| MERS-CoV   | 251 |           | TTCCACTTTGCGCTAATGGTCTTGTATTGCGCTTATACAAGAATATGTGC  |
| HCoV-229E  | 251 |           | TCCCAGTGTGTTCAAGCTGGTAATGTCTTGGTTTGTACAAAAGTTCTGCT  |
| HCoV-OC43  | 251 |           | TCAAGTTGTTAATGAATGGTCTGGTTTTTGGTCTATATAACAATCTTGT   |
| HCoV-NL63  | 251 |           | TTCCATTATGTTCAAGCTGGTAATATATTGGTTTATATAAAAATTAGCA   |
| HCoV-HKU1  | 251 |           | TTAAGTTAGTTATGAATGGTATGGTCTTGGTTTGTATAACAATCTTGC    |

**Figure S3.** Sensor S1's target RNA and its upstream and downstream flanking sequences in the *orf1ab* gene of SARS-CoV-2. Homology regions to this sequence from other coronaviruses including SARS-CoV, MERS-CoV, HCoV-229E, HCoV-OC43, HCoV-NL63, and HCoV-HKU1. The red box indicates the homologous sequences of the target region of sensor S1. The blue box denotes the homologous sequences of its upstream and downstream flanking sequences that were synthesized for the cross-reactivity test.

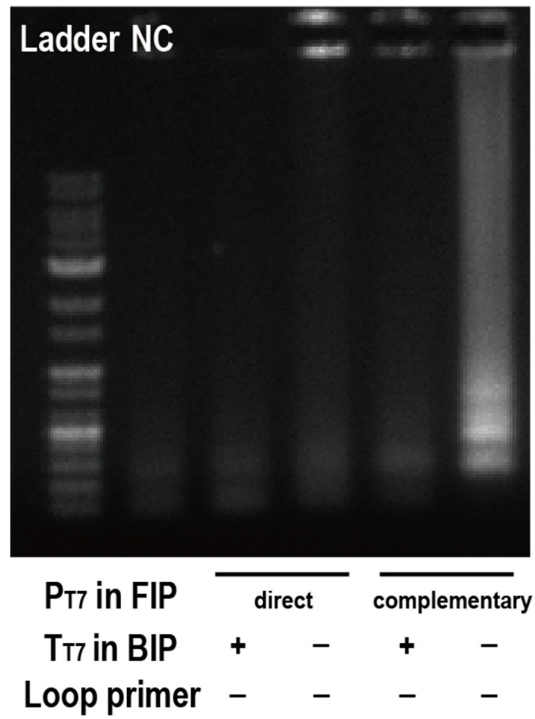

**Fig S4.** Gel electrophoresis of the modified RT-LAMP products. The ladder-like gel bands are the typical amplification pattern of LAMP. T7 promoter ( $P_{T7}$ ) was inserted in the FIP primer with a direct or complementary sequence. In the presence of T7 terminator ( $T_{T7}$ ) in the BIP primer, the RT-LAMP exhibited less amplification. Of note, we used RT-LAMP primers of sensor M6.

## Reference

1. Pardee, K.; Green, A. A.; Takahashi, M. K.; Braff, D.; Lambert, G.; Lee, J. W.; Ferrante, T.; Ma, D.; Donghia, N.; Fan, M.; Daringer, N. M.; Bosch, I.; Dudley, D. M.; O'Connor, D. H.; Gehrke, L.; Collins, J. J. Rapid, Low-Cost Detection of Zika Virus Using Programmable Biomolecular Components. *Cell* 2016, 165, 1255–1266.
